# Supplementary material for: Conditional survival estimate of acute-on-chronic hepatitis B liver failure: A dynamic prediction based on a multicenter cohort
Source: PubMed Central journal article supplement (PMC4695116; doi:10.18632/oncotarget.4666), 2015-07-15
Supplement: oncotarget-06-23261-s001.pdf [file oncotarget-06-23261-s001.pdf]

## SUPPLEMENTARY TABLE

Supplementary Table S1. Characteristics of patients with acute-on-chronic hepatitis B liver failure

| Variable                               | Total (n = 278) |
|----------------------------------------|-----------------|
| <b>Clinical parameters</b>             |                 |
| Age (years)                            | 45.8 ± 13.2     |
| Male gender No.(%)*                    | 215 (77.3%)     |
| Hepatic encephalopathy No.(%)*         | 57 (20.5%)      |
| Liver cirrhosis No.(%)*                | 127 (45.6%)     |
| Infection No.(%)*                      | 101 (36.6%)     |
| Ascites No.(%)*                        | 156 (56.1%)     |
| Hepatorenal syndrome No.(%)*           | 15 (5.4%)       |
| <b>Laboratory parameters</b>           |                 |
| White blood cell (10 <sup>12</sup> /L) | 7.37 ± 4.65     |
| Haemoglobin (g/L)                      | 125.08 ± 22.53  |
| Platelet (10 <sup>9</sup> /L)          | 46.1 ± 30.24    |
| Serum sodium (mmol/L)                  | 136.22 ± 5.34   |
| ALT (U/L)                              | 591.49 ± 647.68 |
| AST (U/L)                              | 516.1 ± 668.87  |
| Albumin (g/L)                          | 30.85 ± 5.75    |
| Alkaline phosphatase (U/L)             | 153.26 ± 58.81  |
| Total bilirubin (µmol/L)               | 294.1 ± 162.52  |
| creatinine (µmol/L)                    | 74.19 ± 41.79   |
| INR                                    | 2.65 ± 1.5      |
| <b>Scoring systems</b>                 |                 |
| MELD score                             | 25.49 ± 7.98    |
| Child score                            | 9.11 ± 1.58     |

**NOTE:** ALT, alanine aminotransferase; AST, aspartate aminotransferase; INR, international normalized ratio; MELD, model for end-stage liver disease.

\*Dichotomous values.
